# Supplementary material
Source: Royal Society of Chemistry journal article supplement (doi:10.1039/d6ea00034g)
Supplement: d6ea00034g1.pdf [file d6ea00034g1.pdf]

Supplementary Information for *Atmospheric fates and global  
warming potential of HFO-1234ze(E) and its degradation  
product trifluoroacetaldehyde (CF<sub>3</sub>CHO)*

Beth Killen<sup>1</sup>, Jenny A. Fisher<sup>2,3</sup>, Christopher S. Hansen<sup>1</sup>, Paul B. Krummel<sup>4</sup>, Martin K.  
Vollmer<sup>5</sup>, and Scott H. Kable<sup>1</sup>

<sup>1</sup>School of Chemistry, UNSW Sydney, NSW 2052, Australia

<sup>2</sup>College of Science and Engineering, James Cook University, Douglas, QLD 4811, Australia

<sup>3</sup>Environmental Futures, University of Wollongong, Wollongong, NSW 2522, Australia

<sup>4</sup>CSIRO Environment, Aspendale, Victoria, Australia

<sup>5</sup>Laboratory for Air Pollution / Environmental Technology, Empa, Swiss Federal Laboratories for Materials Science  
and Technology, Überlandstrasse 129, 8600 Dübendorf, Switzerland

February 24, 2026

This Supplementary Information provides additional details that support the main manuscript. It includes: Supplementary Text S1: Comparison of AtChem2 and GEOS-Chem CF<sub>3</sub>CHO sinks, Supplementary Figures S1-S4, and Supplementary Tables S1-S2.

## S1 Comparison of AtChem2 and GEOS-Chem $\text{CF}_3\text{CHO}$ Sinks

Comparing the relative contributions of photochemical loss processes in GEOS-Chem (Figure S4) to those in AtChem2 (main text Figure 3b) reveals some differences between the 3D and box model simulations. Although photolysis dominates in both cases, it accounts for a larger fraction in the box model (80%) than in the 3D model (67%). This difference is likely due to the different time periods covered by each simulation: the box model represents a summer month when photolysis conditions are optimal, while the 3D model uses annual average conditions that include winter months and high-latitude regions where solar radiation is reduced and photolysis rates are much lower. The higher photolysis fraction in the box model also reflects its boundary-layer focus, where deposition is less important than in the full 3D simulation that includes efficient mid-tropospheric wet removal. Despite these differences, the two models both show that the net reaction with  $\text{HO}_2$  is of minor importance.

## S2 Supplementary Figures

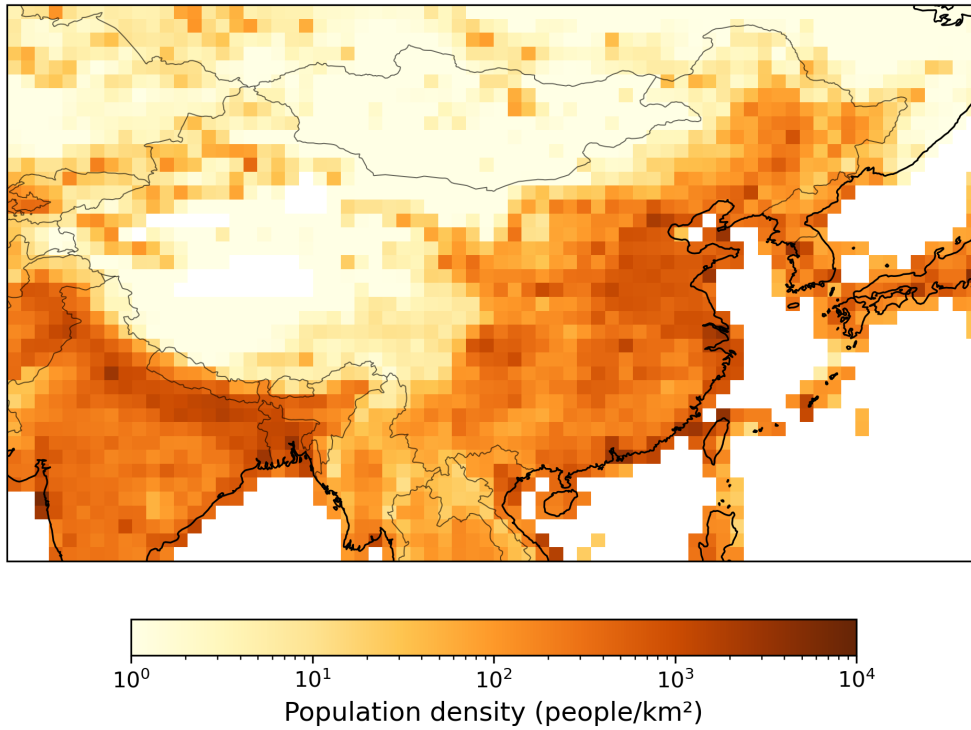

Figure S1: Population density distribution over China used to spatially allocate HFO-1234ze(E) emissions ( $12.6 \text{ Gg yr}^{-1}$ ) for Henry's Law sensitivity tests. Emissions are distributed proportionally to 2015 population density (1), following the HCFC-141b replacement scenario from Wang *et al.* (2).

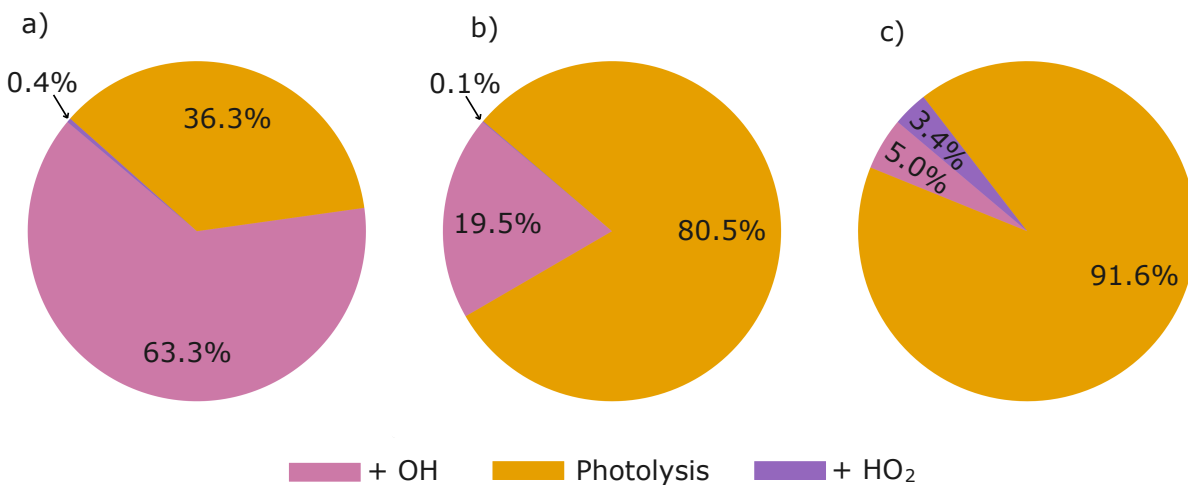

Figure S2: Average percentage contribution of each loss process to total atmospheric removal of CF<sub>3</sub>CHO under different conditions. a) with 10x increased HO<sub>2</sub> concentration, b) increasing the rate of the forwards reaction in Long *et al.* (3) by 10, and c) simulating conditions representative of around 5 km altitude.

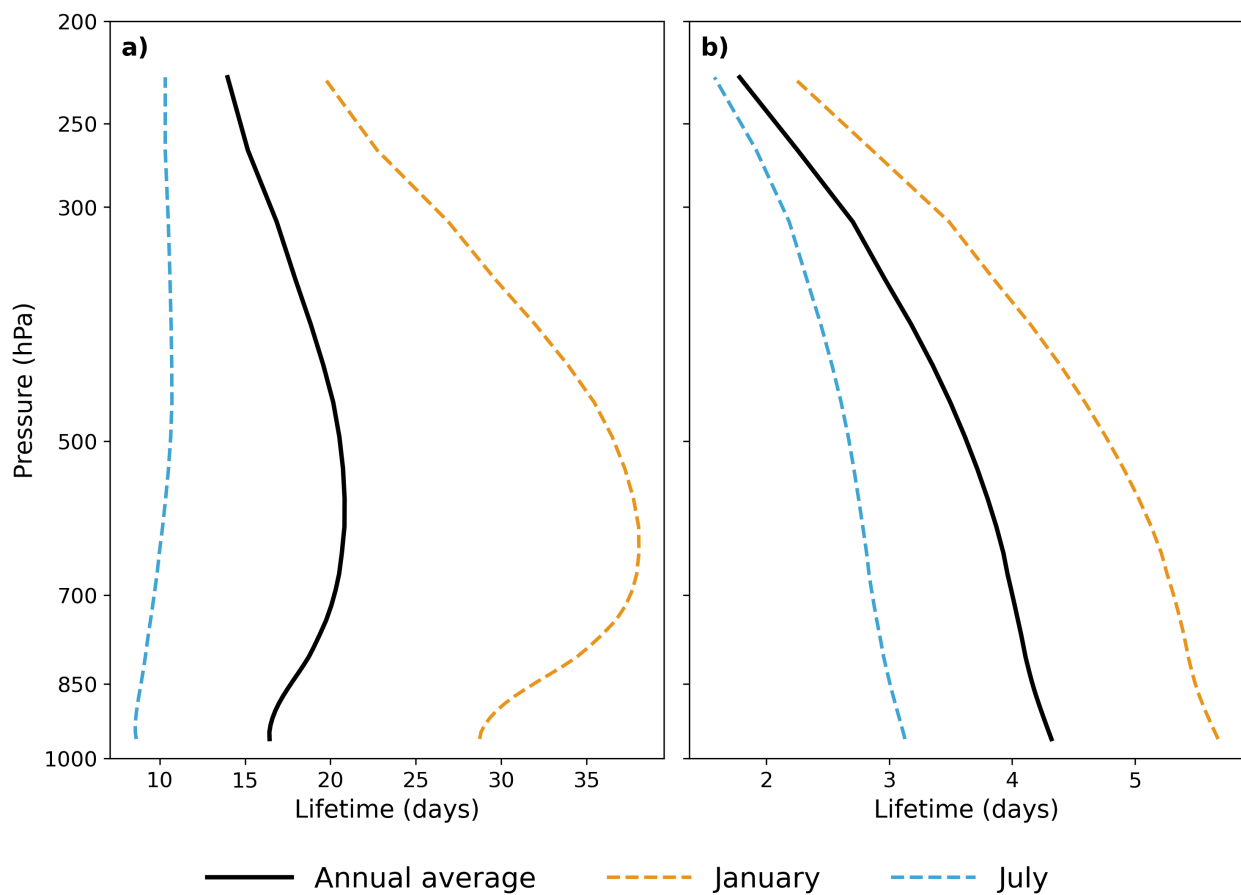

Figure S3: Seasonal and altitudinal variations in the lifetime of a) HFO-1234ze(E) and b) CF<sub>3</sub>CHO.

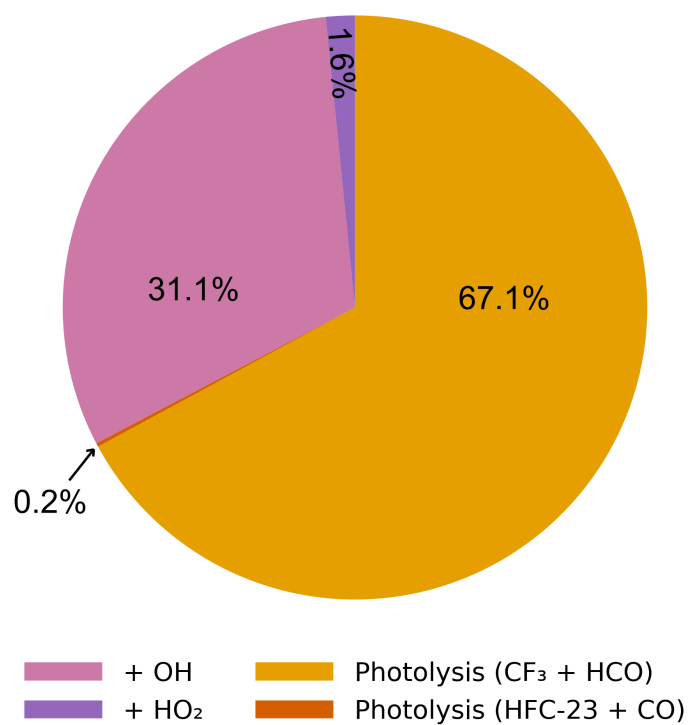

Figure S4: Relative contribution of CF<sub>3</sub>CHO photochemical processes only (no deposition) as simulated by GEOS-Chem.

## S3 Supplementary Tables

Table S1: Pressure-dependent quantum yields for CF<sub>3</sub>CHO photolysis to HFC-23 and CO (R2) at 1 nm resolution (242 - 320 nm) used in Cloud-J photolysis rate calculations. Wavelengths 248, 266, 281 and 308 nm are directly from Van Hooymissen *et al.* (4). All others are interpolated to 1 nm intervals as described in main text Section 2.2.2.

| Wavelength (nm) | QY (650 Torr) | QY (100 Torr) |
|-----------------|---------------|---------------|
| 242             | 0.395         | 0.395         |
| 243             | 0.396         | 0.396         |
| 244             | 0.395         | 0.395         |
| 245             | 0.394         | 0.394         |
| 246             | 0.395         | 0.394         |
| 247             | 0.395         | 0.393         |
| 248             | 0.358         | 0.358         |
| 249             | 0.394         | 0.391         |
| 250             | 0.394         | 0.389         |
| 251             | 0.393         | 0.389         |
| 252             | 0.389         | 0.388         |
| 253             | 0.387         | 0.387         |
| 254             | 0.386         | 0.387         |
| 255             | 0.385         | 0.385         |
| 256             | 0.384         | 0.384         |
| 257             | 0.382         | 0.382         |
| 258             | 0.379         | 0.379         |
| 259             | 0.373         | 0.373         |
| 260             | 0.367         | 0.367         |
| 261             | 0.364         | 0.364         |
| 262             | 0.360         | 0.360         |
| 263             | 0.352         | 0.352         |
| 264             | 0.344         | 0.345         |
| 265             | 0.337         | 0.342         |
| 266             | 0.407         | 0.407         |
| 267             | 0.316         | 0.320         |

*Continued on next page*

| Wavelength (nm) | QY (650 Torr) | QY (100 Torr) |
|-----------------|---------------|---------------|
| 268             | 0.300         | 0.301         |
| 269             | 0.281         | 0.281         |
| 270             | 0.264         | 0.267         |
| 271             | 0.247         | 0.256         |
| 272             | 0.225         | 0.247         |
| 273             | 0.202         | 0.235         |
| 274             | 0.181         | 0.219         |
| 275             | 0.160         | 0.202         |
| 276             | 0.140         | 0.184         |
| 277             | 0.122         | 0.167         |
| 278             | 0.105         | 0.151         |
| 279             | 0.094         | 0.137         |
| 280             | 0.084         | 0.123         |
| 281             | 0.056         | 0.114         |
| 282             | 0.055         | 0.097         |
| 283             | 0.044         | 0.086         |
| 284             | 0.036         | 0.075         |
| 285             | 0.030         | 0.066         |
| 286             | 0.025         | 0.057         |
| 287             | 0.020         | 0.050         |
| 288             | 0.017         | 0.043         |
| 289             | 0.014         | 0.037         |
| 290             | 0.011         | 0.032         |
| 291             | 0.009         | 0.028         |
| 292             | 0.007         | 0.024         |
| 293             | 0.006         | 0.021         |
| 294             | 0.005         | 0.018         |
| 295             | 0.004         | 0.015         |
| 296             | 0.003         | 0.013         |
| 297             | 0.003         | 0.011         |
| 298             | 0.002         | 0.010         |
| 299             | 0.002         | 0.008         |

*Continued on next page*

---

| Wavelength (nm) | QY (650 Torr) | QY (100 Torr) |
|-----------------|---------------|---------------|
| 300             | 0.001         | 0.007         |
| 301             | 0.001         | 0.006         |
| 302             | 0.001         | 0.005         |
| 303             | 0.001         | 0.004         |
| 304             | 0.001         | 0.004         |
| 305             | 0.000         | 0.003         |
| 306             | 0.000         | 0.003         |
| 307             | 0.000         | 0.002         |
| 308             | 0.000         | 0.002         |
| 309             | 0.000         | 0.002         |
| 310             | 0.000         | 0.001         |
| 311             | 0.000         | 0.001         |
| 312             | 0.000         | 0.001         |
| 313             | 0.000         | 0.001         |
| 314             | 0.000         | 0.001         |
| 315             | 0.000         | 0.001         |
| 316             | 0.000         | 0.001         |
| 317             | 0.000         | 0.000         |
| 318             | 0.000         | 0.000         |
| 319             | 0.000         | 0.000         |
| 320             | 0.000         | 0.000         |

---

Table S2: Model-observation comparison for HFO-1234ze(E) at AGAGE monitoring sites. Observations are multi year means (2020-2024), and model values are from the 2019 simulation, sampled at each site location.

| Site               | Lat   | Lon    | Obs (ppt) | Model (ppt) | RMSE (ppt) <sup>†</sup> | Bias (ppt) | NMB (%) <sup>‡</sup> |
|--------------------|-------|--------|-----------|-------------|-------------------------|------------|----------------------|
| Zeppelin           | 78.9  | 11.9   | 0.12      | 0.15        | 0.06                    | 0.03       | 28                   |
| Mace Head          | 53.3  | -9.9   | 0.18      | 0.19        | 0.07                    | 0.01       | 8                    |
| Jungfraujoch       | 46.6  | 8.0    | 0.26      | 0.14        | 0.16                    | -0.12      | -47                  |
| Trinidad Head      | 41.1  | -124.2 | 0.16      | 0.17        | 0.07                    | 0.01       | 7                    |
| Gosan              | 35.4  | 129.3  | 0.16      | 0.76        | 0.62                    | 0.60       | 369                  |
| Ragged Point       | 13.2  | -59.4  | 0.02      | 0.03        | 0.01                    | 0.01       | 42                   |
| Cape Matatula      | -14.3 | -170.6 | 0.01      | 0.00        | 0.00                    | 0.00       | -33                  |
| Kennaook/Cape Grim | -40.7 | 144.7  | 0.01      | 0.05        | 0.04                    | 0.04       | 637                  |

<sup>†</sup>RMSE: Root Mean Square Error,  $\sqrt{\frac{1}{n} \sum_{i=1}^n (M_i - O_i)^2}$ , based on monthly means. <sup>‡</sup>NMB: Normalized Mean Bias, calculated as  $(\text{Model} - \text{Obs})/\text{Obs} \times 100\%$ .

## References

- [1] Center for International Earth Science Information Network – CIESIN – Columbia University Gridded Population of the World, Version 4 (GPWv4): Population Density, Revision 11. 2018.
- [2] Wang, Y.; Wang, Z.; Sun, M.; Guo, J.; Zhang, J. Emissions, degradation and impact of HFO-1234ze from China PU foam industry. *Science of The Total Environment* **2021**, *780*, 146631.
- [3] Long, B.; Xia, Y.; Truhlar, D. G. Quantitative Kinetics of HO<sub>2</sub> Reactions with Aldehydes in the Atmosphere: High-Order Dynamic Correlation, Anharmonicity, and Falloff Effects Are All Important. *Journal of the American Chemical Society* **2022**, *144*, 19910–19920, PMID: 36264240.
- [4] Van Hoomissen, D.; Chattopadhyay, A.; Montzka, S. A.; Burkholder, J. B. CHF<sub>3</sub> (HFC-23) and CF<sub>3</sub>CHO Quantum Yields in the Pulsed Laser Photolysis of CF<sub>3</sub>CHO at 248, 266, 281, and 308 nm. *ACS Earth and Space Chemistry* **2025**, *9*, 589–602.
