# Supplementary material
Source: Royal Society of Chemistry journal article supplement (doi:10.1039/d6ea00034g)

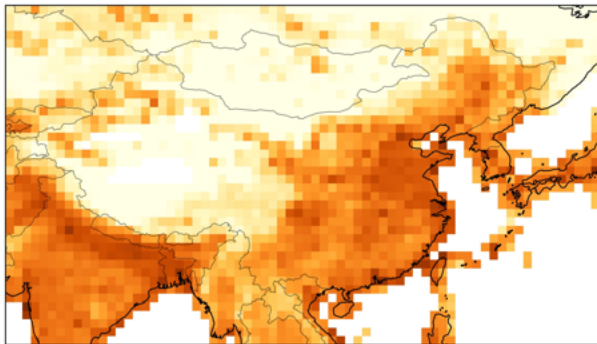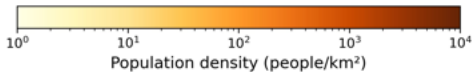

Supplement: d6ea00034g2.pdf [file d6ea00034g2.pdf]

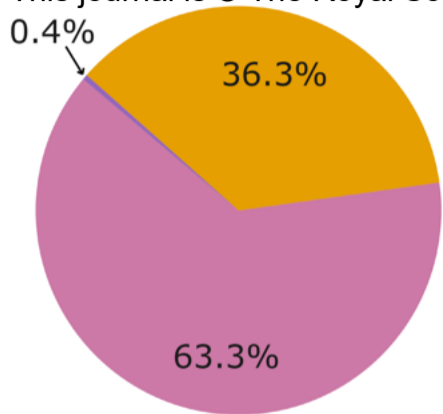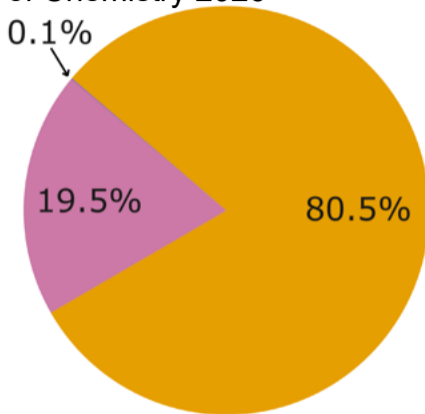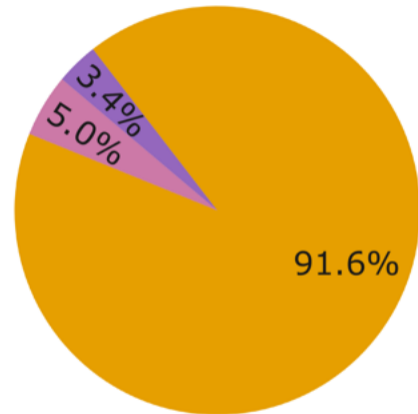

+ OH

Photolysis

+ HO<sub>2</sub>

Supplement: d6ea00034g3.pdf [file d6ea00034g3.pdf]

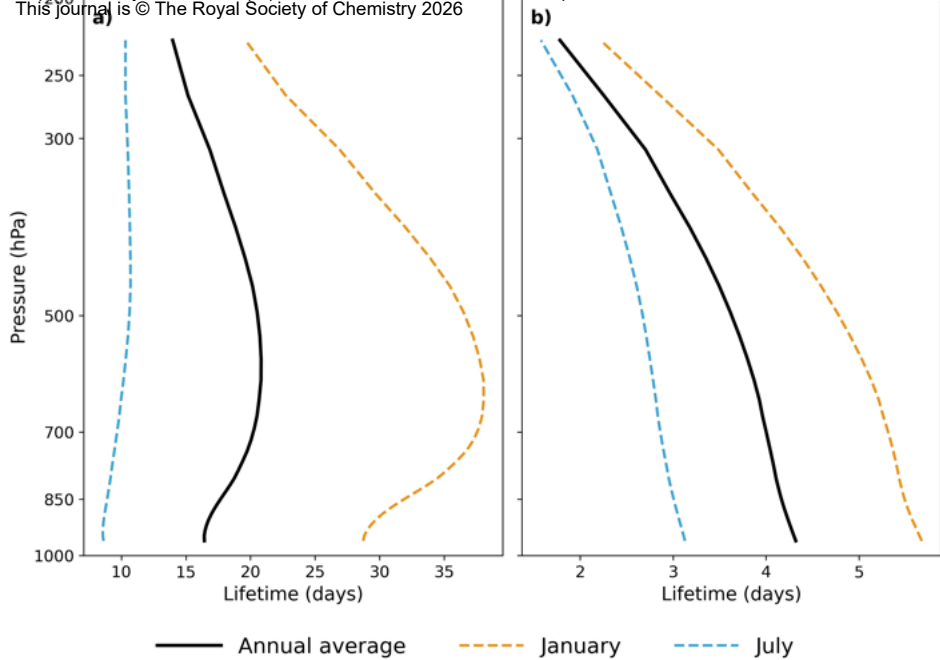

Supplement: d6ea00034g4.pdf [file d6ea00034g4.pdf]

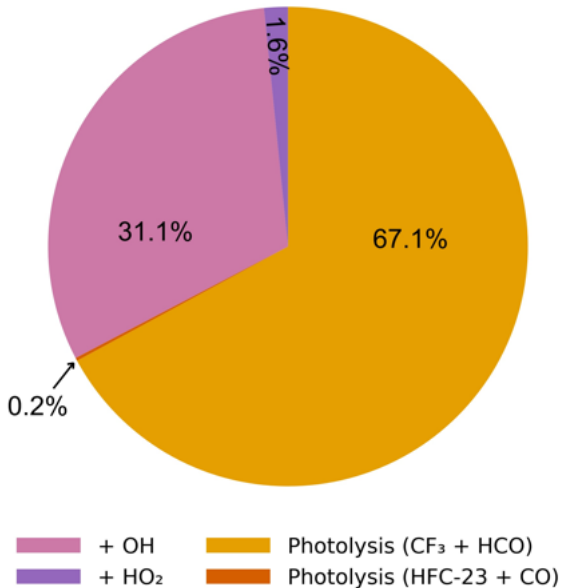

Supplement: d6ea00034g5.pdf [file d6ea00034g5.pdf]
